RESEARCH ARTICLE

# Weight Gain in Survivors Living in Temporary Housing in the Tsunami-Stricken Area during the Recovery Phase following the Great East Japan Earthquake and Tsunami

Shuko Takahashi<sup>1,7\*</sup>, Yuki Yonekura<sup>2</sup>, Ryohei Sasaki<sup>3</sup>, Yukari Yokoyama<sup>4</sup>, Koza Tanno<sup>2</sup>, Kiyomi Sakata<sup>2</sup>, Akira Ogawa<sup>5</sup>, Seichiro Kobayashi<sup>6</sup>, Taro Yamamoto<sup>1,7</sup>

**1** Department of International Health, Nagasaki University, Graduate School of Biomedical Sciences, Sakamoto, Nagasaki, Japan, **2** Department of Hygiene and Preventive Medicine, School of Medicine, Iwate Medical University, Nishitokuta, Yahaba-cho, Shiwa-gun, Iwate, Japan, **3** Iwate Tohoku Medical Megabank Organization, Nishitokuta, Yahaba-cho, Shiwa-gun, Iwate, Japan, **4** Department of Social Welfare, Nihon Fukushi University, Egemae, Okuda, Mihama-cho, Chita-gun, Aichi, Japan, **5** Iwate Medical University, Iwate, Japan, **6** Department of Plastic and Reconstructive Surgery, School of Medicine, Iwate Medical University, Iwate, Japan, **7** Department of International Health, Institute of Tropical Medicine, Nagasaki University, Sakamoto, Nagasaki, Japan

\* [shutakahashi-iwt@umin.ac.jp](mailto:shutakahashi-iwt@umin.ac.jp)

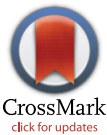

OPEN ACCESS

**Citation:** Takahashi S, Yonekura Y, Sasaki R, Yokoyama Y, Tanno K, Sakata K, et al. (2016) Weight Gain in Survivors Living in Temporary Housing in the Tsunami-Stricken Area during the Recovery Phase following the Great East Japan Earthquake and Tsunami. PLoS ONE 11(12): e0166817. doi:10.1371/journal.pone.0166817

**Editor:** Fernando Guerrero-Romero, Mexican Social Security Institute, MEXICO

**Received:** December 10, 2015

**Accepted:** November 4, 2016

**Published:** December 1, 2016

**Copyright:** © 2016 Takahashi et al. This is an open access article distributed under the terms of the [Creative Commons Attribution License](https://creativecommons.org/licenses/by/4.0/), which permits unrestricted use, distribution, and reproduction in any medium, provided the original author and source are credited.

**Data Availability Statement:** All relevant data are within the paper and its Supporting Information files.

**Funding:** The study was supported by a Health Labour Sciences Research Grant from the Ministry of Health, Labour, and Welfare of Japan (H23-Tokubetsu-Shitei-002; H24-kenki-sitei-001). This work was partly conducted at the Joint Usage / Research Center on Tropical Disease, Institute of Tropical Medicine, Nagasaki University ([http://www.mext.go.jp/a\\_menu/kyoten/](http://www.mext.go.jp/a_menu/kyoten/)). This study is a

## Abstract

### Introduction

Survivors who lost their homes in the Great East Japan Earthquake and Tsunami were forced to live in difficult conditions in temporary housing several months after the disaster. Body weights of survivors living in temporary housing for a long period might increase due to changes in their life style and psychosocial state during the medium-term and long-term recovery phases. The aim of this study was to determine whether there were differences between body weight changes of people living in temporary housing and those not living in temporary housing in a tsunami-stricken area during the medium-term and long-term recovery phases.

### Materials and methods

Health check-ups were performed about 7 months after the disaster (in 2011) and about 18 months after the disaster (in 2012) for people living in a tsunami-stricken area (n = 6,601, mean age = 62.3 y). We compared the changes in body weight in people living in temporary housing (TH group, n = 2,002) and those not living in temporary housing (NTH group, n = 4,599) using a multiple linear regression model.

### Results

While there was no significant difference between body weights in the TH and NTH groups in the 2011 survey, there was a significant difference between the mean changes in body weight in both sexes. We found that the changes in body weight were significantly greater in the TH group than in the NTH group in both sexes. The partial regression coefficients of

part of the incubation study "Exploratory Studies on Human Adaptation Mechanism to Modern Plague" funded by the Research Institute for Humanity and Nature, Japan. This research was in part supported by Environment Research and Technology Development Fund (S-11-3) of Ministry of the Environment, Japan.

**Competing Interests:** The authors have declared that no competing interests exist.

mean change in body weight were +0.52 kg (P-value < 0.001) in males in the TH group and +0.56 kg (P-value < 0.001) in females in the TH group (reference: NTH group).

## Conclusion

Analysis after adjustment for life style, psychosocial factors and cardiovascular risk factors found that people living in temporary housing in the tsunami- stricken area had a significant increase in body weight.

## Introduction

On March 11, 2011, a massive earthquake with a magnitude of 9.0 on the Richter scale and a subsequent tsunami struck the northeast coast of Japan (Great East Japan Earthquake and Tsunami). A total of 18,490 people died or were missing after the tsunami, and the homes of about 470,000 evacuees were greatly damaged [1–4]. The estimated total financial damage was more than 160 billion dollars [5]. The tsunami destroyed commercial and public facilities including gymnasiums and parks. Many of the survivors lost family members and their homes.

After the disaster, most of the survivors did not move to inland towns but stayed in coastal towns that had been destroyed by the tsunami. The homes of some of the survivors were completely destroyed by the tsunami, but some houses remained in fact. Survivors who lost their homes were forced to live in inconvenient conditions; they lived in shelters just after the disaster, and later moved to temporary housing areas on hillsides of the coastal towns. Since large areas of the coastal towns were destroyed by the tsunami, the survivors could not live in the original seaside areas. Many of the survivors could not buy land to build a new house because of their difficult economic situation. In Iwate Prefecture, one of the prefectures damaged by the Great East Japan Earthquake and Tsunami, 19,584 people (1.5% of the prefecture's population) were still living in temporary housing as of July 2015 [6].

Obesity and weight gain are important risk factors for mortality and morbidity from vascular diseases such as cardiovascular disease, diabetes mellitus, and hypertension [7–9]. Previous studies reported that body weights of survivors of earthquakes or hurricanes increased after the disaster [10–12]. In the Irpinia earthquake, the average weight of survivors had increased by 1.5kg two months after the disaster [10]. The mean body weight of survivors of the Great East Japan Earthquake living in the Soma area of Fukushima prefecture had increased by 0.6kg six months after the disaster [11]. Body mass indexes of displaced survivors of Hurricane Katrina increased from 7 to 19 months after the disaster [12]. Although it has been reported that body weights of survivors of disasters increased in the short term after a disaster, there have been few studies on body weight changes in survivors living in temporary housing a long time after a disaster, changes in body weights depending on living conditions in the affected area were not assessed in previous studies. The subjects of our study lived in shelters a few months after the earthquake. Body weights may have started to increase at that time. They were also forced to live in inconvenient living conditions in temporary housing in affected areas. Most of the temporary houses were container houses made from tinplate. The temporary houses had water and electricity, but they were small, had no soundproofing, and were not sufficiently cold-resistant. Photographs of the temporary houses are shown in [S1A and S1B Fig](#). Residents in temporary housing lost the local community that they previously belonged to and had no opportunity to participate in community life [13, 14]. There was no commercial area such as an area with shops near most of the temporary houses [15]. It has

been reported that the health status of disaster survivors living in temporary housing deteriorated due to changes in their life style and psychosocial state compared to the health status of people who continued to live in the same house [16, 17]. It is possible that the living conditions in that period caused further weight gain.

The aim of this study was to determine whether there was a difference between changes in body weights of people living in temporary housing and people not living in temporary housing in tsunami-stricken areas during the medium-term and long-term recovery phases after the Great East Japan Earthquake and Tsunami.

## Materials and Methods

The research plan was deliberated and approved by the Ethics Committee of Iwate Medical University (approval no. H23-69). A total of 10,198 participants aged 18 years or older who provided written informed consent comprised the original cohort. The rights and welfare of the participants in this study were protected by the ethical guidelines outlined in the Declaration of Helsinki.

### Study population

We analyzed data that were obtained by the Research Project for Prospective Investigation of Health Problems Among Survivors of the Great East Japan Earthquake and Tsunami Disaster (RIAS) described previously [18–20] (Fig 1).

The process for selection of participants is illustrated in Fig 2. We sent out notifications of the health survey and several types of questionnaire to all residents aged 18 years or older (total of 42,831 residents). In the 2011 survey, a total of 10,198 participants who provided written informed consent comprised the original cohort (acceptance rate of 96.6%). After excluding people who did not participate in the 2012 survey, those aged 17 years or younger, and those who lacked data for at least one variable that was necessary for analysis, we analyzed data for 6,601 participants (2,504 males and 4,097 females; 15.4% of the total population). The mean periods from the disaster were 7.7 months in the 2011 survey and 18.4 months in the 2012 survey.

### Measurements

**Living conditions.** The process for determining living conditions is shown in Fig 3. In the 2011 survey, participants selected one of the following 6 items regarding living place: “prefabricated temporary housing,” “shelter,” “same house as that during the disaster,” “family’s, friend’s or relative’s house,” “new house built after the disaster or rental apartment,” and “others.” We classified the living conditions into two groups: a temporary housing (TH) group (prefabricated temporary housing and shelters) and non-temporary housing (NTH) group (same house as that during the disaster; family’s, friend’s, or relative’s house; new house built after the disaster or rental apartment; and others). In the 2012 survey, we asked participants whether they had relocated from their living place from the date of the 2011 survey to the date of the 2012 survey. Participants selected one of the following 5 items: “prefabricated temporary housing,” “same house as that during the disaster,” “family’s, friend’s, or relative’s house,” “new house built after the disaster or rental apartment,” and “others.” Finally, we classified the living conditions again into TH and NTH groups (2,002 participants in the TH group and 4,599 participants in the NTH group).

**Anthropometrical examinations.** Anthropometrical examinations (body weight (kg) and height (cm)) were performed (body weight: AD-6400, A&D Co., Ltd, Tokyo, Japan; BWB-200, TANITA Corporation, Tokyo, Japan; height: AD-6121A, A&D Co., Ltd, Tokyo, Japan; YG200D, YAGAMI INC, Nagoya, Japan). Body weight was measured with an accuracy of +/-

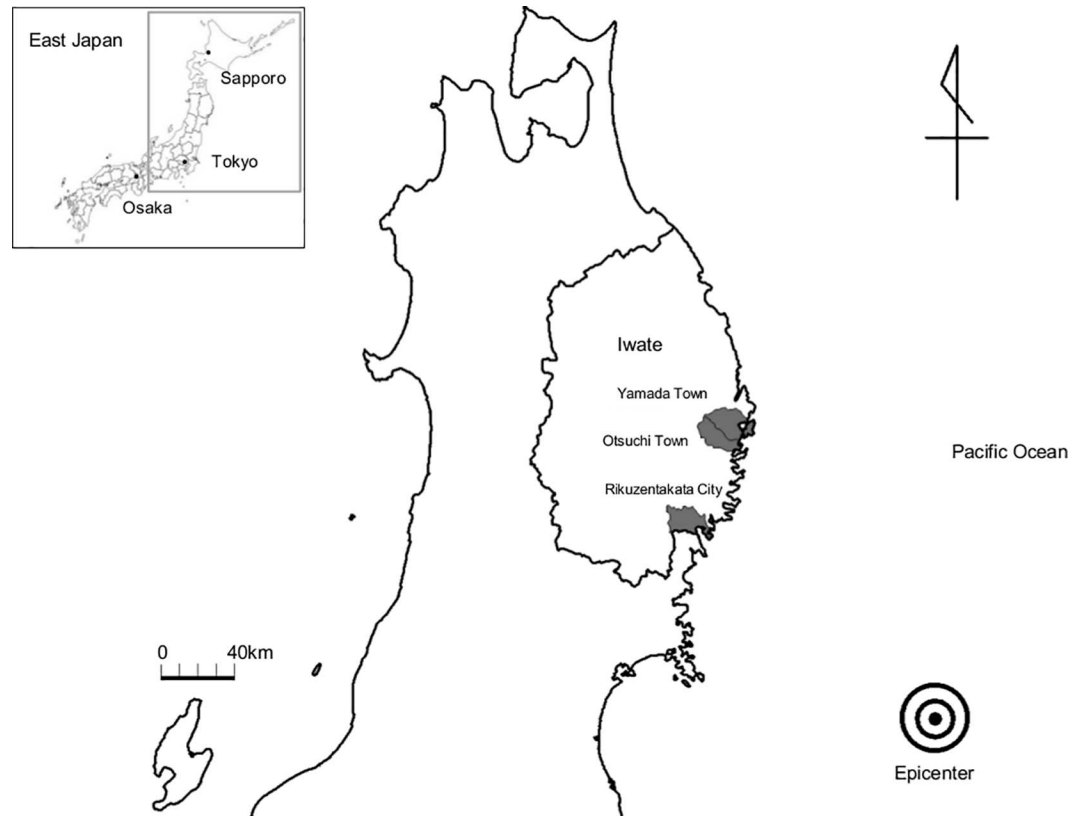

**Fig 1. Map of the study area.** The gray zone illustrates the study area along the Pacific Ocean coast that was affected by the tsunami. The study area includes Yamada Town, Otsuchi Town, and Rikuzentakata City. The epicenter of the earthquake is marked by a bull's eye. The numbers of deaths or missing people were 834 in Yamada, 1,279 in Otsuchi, and 1,808 in Rikuzentakata, accounting for 4.5%, 8.4%, and 7.8% of the total populations of those municipalities, respectively.

doi:10.1371/journal.pone.0166817.g001

0.1 kg using a standard scale while dressed in very light clothing without shoes. Body mass index (BMI;  $\text{kg}/\text{m}^2$ ) was calculated as body weight (kg) divided by height ( $\text{m}$ )<sup>2</sup>.

**Life style factors.** We classified smoking status as current smokers or not current smokers. We additionally classified smoking status as quitting smoking during the follow-up period or not. We classified alcohol drinking status as drinkers or non-drinkers. We classified participants with activity levels  $<23$  Mets per week as having low physical activity and participants with activity levels  $\geq 23$  Mets per week as having normal physical activity [21, 22]. To assess the average number of meals per day during the past several days, we classified the participants into two categories: those with a small number of meals ( $<3$  times a day) and those with a normal number of meals ( $\geq 3$  times a day).

**Psychosocial factors.** The economic status of the participants was assessed by asking “How do you feel about your current economic situation?” with 4 options of very severe, severe, slightly severe and normal. On the basis of their answers, participants were categorized into two groups: severe (very severe, severe, and slightly severe) and normal. The occupational status of the participants was assessed by asking participants “How was your job changed?”. The occupational status of the participants following the disaster was categorized into two groups: unemployed and employed. Based on previous research using the K6 scale in Japan, the participants were classified into those with psychological distress (scores of 5–24) and those with no psychological distress (score of 0–4) [23, 24]. Based on previous research on the

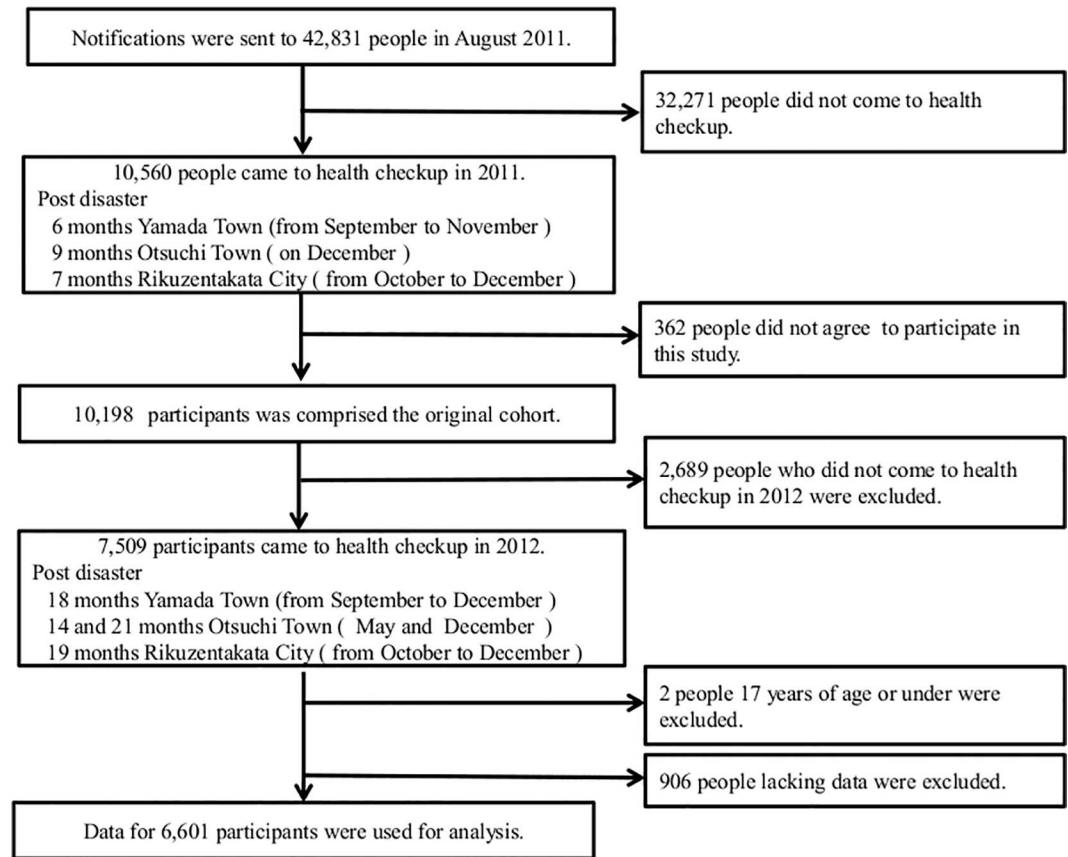

**Fig 2. Flow chart of the procedure used to select participants for the study.** The original cohort consisted of 10,198 participants in 2011. We excluded 2,689 persons who did not come to the health check-up in 2012, 2 people aged 17 years old or under, and 906 people who lacked at least one variable that was used for analysis. We used data from 6,601 participants for analysis.

doi:10.1371/journal.pone.0166817.g002

Athens Insomnia Scale (AIS), the participants were classified as those with insomnia (scores of 6–24) and those with no insomnia (scores of 0–5) [25–28].

**Cardiovascular risk factors.** Metabolic profiles, including blood pressure, serum cholesterol levels and glycemic hemoglobin, and factors associated with body weight were measured. Blood pressure was consecutively measured twice in the sitting position using an automatic device after urination and a 5-minute rest. We calculated mean values of systolic blood pressure (SBP; mmHg) and diastolic blood pressure (DBP; mmHg). We examined results of blood tests for total cholesterol (TC; mg/dl), high-density lipoprotein cholesterol (HDL; mg/dl) by using an automated analyzer, and glycosylated hemoglobin (HbA1c [Japan Diabetes Society, JDS]; %) by using an automated analyzer. Non high-density lipoprotein cholesterol (nonHDL; mg/dl) was calculated as HDL subtracted from TC. The value for HbA1c (%) was estimated as an NGSP equivalent value (%) calculated by the formula  $HbA1c (\%) = HbA1c (JDS) (\%) + 0.4 (\%)$  [29].

Overweight was defined as BMI of  $\geq 25 \text{ kg/m}^2$ . Hypertension was defined as SBP  $\geq 140$  mmHg, DBP  $\geq 90$  mmHg, and hypertension reported in a questionnaire or a combination of those. Dyslipidemia was defined as serum TC  $\geq 220$  mg/dl, serum HDL  $< 40$  mg/dl, and dyslipidemia reported in the questionnaire or a combination of those. Diabetes mellitus was defined as plasma glucose level  $\geq 200$  mg/dl, plasma HbA1c level (NSGP)  $\geq 6.5\%$ , and diabetes mellitus reported in the questionnaire or a combination of those.

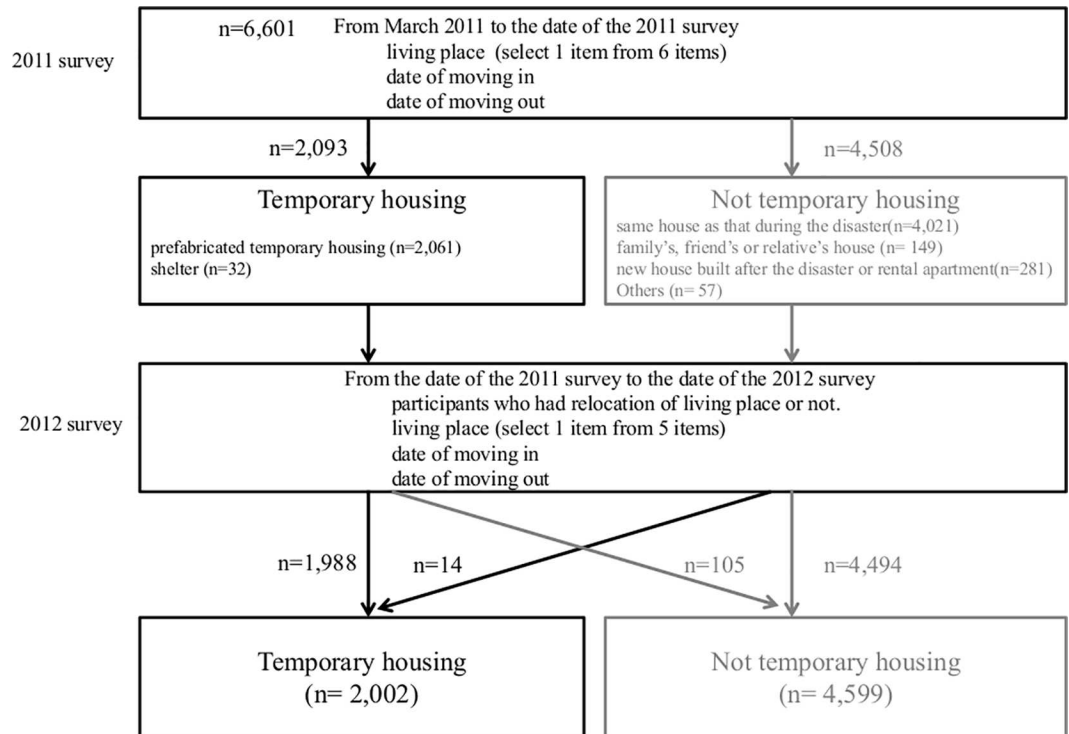

**Fig 3. Flow chart of the process for determining living conditions.** We determined living conditions by asking questions in the 2011 survey and in the 2012 survey according to the flow chart.

doi:10.1371/journal.pone.0166817.g003

### Statistical analysis

We compared baseline characteristics in 2011 of the TH and NTH groups for each sex. In crude analysis, the chi-squared test was used for categorical variables and Student’s t-test was used for continuous variables. In age-adjusted analysis, logistic regression analysis was used for categorical variables and analysis of covariance was used for continuous variables. The change in body weight (kg) from 2011 to 2012 was calculated as body weight in 2011 (kg) subtracted from body weight in 2012 (kg). We compared the mean changes in body weight in the TH and NTH groups using Student’s t-test in all participants by age groups (18–44, 45–54, 55–64, 65–74, and ≥75 years). To examine the mean change in body weight from 2011 to 2012, multiple linear regression analysis was performed using mean change in body weight as a dependent variable and age, SBP, TC, HDLC, HbA1c, life style, psychosocial factors, and cardiovascular risk factors as independent variables. We also compared age-adjusted mean changes in the TH group and NTH group stratified by life style, psychosocial factors and cardiovascular risk factors using analysis of covariance.

All P-values were based on two-sided tests, and P-values <0.05 were considered statistically significant. The Statistical Package for Social Sciences (SPSS) version 19.0 (IBM) was used for all analyses.

### Results

Table 1 summarizes the baseline characteristics of participants in the TH and NTH groups by crude and age-adjusted analyses in the 2011 survey. There were 2,002 participants in the TH group and 4,599 participants in the NTH group. The average ages of the participants were 64.0 years for males and 61.4 years for females. The males in the NTH group were significantly



**Table 1. Baseline characteristics of participants in the TH group and the NTH group in the 2011 survey.**

| Living condition             | Living conditions                 |                          | Males (N = 2,504)  |                       |         | Females (N = 4,097)  |                       |         |
|------------------------------|-----------------------------------|--------------------------|--------------------|-----------------------|---------|----------------------|-----------------------|---------|
|                              |                                   |                          | TH group (N = 775) | NTH group (n = 1,729) | P-value | TH group (N = 1,227) | NTH group (N = 2,870) | P-value |
| Age                          | Age (yr)                          | Mean (SD)                | 62.4 (13.3)        | 64.6 (12.9)           | < 0.001 | 61.0 (14.0)          | 61.5 (13.1)           | 0.314   |
|                              | Age class (18–44)                 | n (%)                    | 103 (13.3)         | 170 (9.8)             | < 0.001 | 196 (16.0)           | 369 (12.9)            | 0.019   |
|                              | (45–54)                           |                          | 97 (12.5)          | 144 (8.3)             |         | 144 (11.7)           | 329 (11.5)            |         |
|                              | (55–64)                           |                          | 165 (21.3)         | 397 (23.0)            |         | 321 (26.2)           | 870 (30.3)            |         |
|                              | (65–75)                           |                          | 279 (36.0)         | 650 (37.6)            |         | 380 (31.0)           | 896 (31.2)            |         |
|                              | (≥75)                             |                          | 131 (16.9)         | 368 (21.3)            |         | 186 (15.2)           | 406 (14.1)            |         |
| Anthropometrical examination | Body weight (kg)                  | Mean (SD)                | 66.5 (11.4)        | 65.0 (10.1)           | 0.001   | 53.8 (9.3)           | 53.7 (8.7)            | 0.695   |
|                              |                                   | Adjusted mean (SE)       | 66.0 (0.4)         | 65.2 (0.2)            | 0.057   | 53.8 (0.3)           | 53.7 (0.2)            | 0.822   |
|                              | BMI (kg/m <sup>2</sup> )          | Mean (SD)                | 24.4 (3.6)         | 24.2 (3.1)            | 0.063   | 23.3 (3.6)           | 23.4 (3.5)            | 0.833   |
|                              |                                   | Adjusted mean (SE)       | 24.4 (0.1)         | 24.2 (0.1)            | 0.181   | 23.3 (0.1)           | 23.4 (0.1)            | 0.926   |
| Blood pressure               | SBP (mmHg)                        | Mean (SD)                | 128.4 (17.2)       | 129.5 (17.4)          | 0.145   | 123.6 (18.1)         | 125.2 (19.1)          | 0.014   |
|                              |                                   | Adjusted mean (SE)       | 128.6 (0.6)        | 129.3 (0.4)           | 0.357   | 123.8 (0.5)          | 125.1 (0.3)           | 0.029   |
|                              | DBP (mmHg)                        | Mean (SD)                | 77.2 (10.6)        | 76.5 (10.7)           | 0.128   | 72.3 (10.7)          | 72.9 (10.5)           | 0.067   |
|                              |                                   | Adjusted mean (SE)       | 77.1 (0.4)         | 76.5 (0.3)            | 0.205   | 72.3 (0.3)           | 72.9 (0.2)            | 0.094   |
| Blood tests                  | TC (mg/dl)                        | Mean (SD)                | 199.7 (33.8)       | 196.6 (33.9)          | 0.037   | 210.4 (34.1)         | 209.6 (35.2)          | 0.515   |
|                              |                                   | Adjusted mean (SE)       | 199.0 (1.2)        | 196.9 (0.8)           | 0.140   | 210.5 (1.0)          | 209.6 (0.7)           | 0.477   |
|                              | HDLC (mg/dl)                      | Mean (SD)                | 59.0 (16.9)        | 59.2 (16.5)           | 0.865   | 67.2 (16.6)          | 66.6 (16.4)           | 0.272   |
|                              |                                   | Adjusted mean (SE)       | 59.1 (0.6)         | 59.1 (0.4)            | 0.930   | 67.1 (0.5)           | 66.6 (0.3)            | 0.348   |
|                              | nonHDLC (mg/dl)                   | Mean (SD)                | 140.7 (35.7)       | 137.5 (34.9)          | 0.037   | 143.2 (34.8)         | 143.0 (36.0)          | 0.897   |
|                              |                                   | Adjusted mean (SE)       | 140.0 (1.3)        | 137.8 (0.8)           | 0.144   | 143.3 (1.0)          | 143.0 (0.7)           | 0.787   |
|                              | HbA1c (%)                         | Mean (SD)                | 5.75 (0.74)        | 5.74 (0.66)           | 0.717   | 5.61 (0.46)          | 5.65 (0.58)           | 0.023   |
|                              |                                   | Adjusted mean (SE)       | 5.76 (0.03)        | 5.74 (0.02)           | 0.368   | 5.61 (0.02)          | 5.65 (0.01)           | 0.038   |
| Life style factors           | Current smokers                   | n (%)                    | 250 (32.3)         | 444 (25.7)            | 0.001   | 75 (6.1)             | 146 (5.1)             | 0.183   |
|                              |                                   | Adjusted proportion (SE) | 30.0 (1.7)         | 25.0 (1.1)            | 0.013   | 4.0 (0.5)            | 3.0 (0.3)             | 0.437   |
|                              | Quitting smoking                  | n (%)                    | 2.0 (0.5)          | 2.0 (0.3)             | 0.605   | 0.0 (0.2)            | 0.0 (0.1)             | 0.936   |
|                              |                                   | Adjusted proportion (SE) | 490 (63.2)         | 1073 (62.1)           | 0.577   | 168 (13.7)           | 368 (12.8)            | 0.45    |
|                              | Drinkers                          | n (%)                    | 490 (63.2)         | 1073 (62.1)           | 0.577   | 168 (13.7)           | 368 (12.8)            | 0.450   |
|                              |                                   | Adjusted proportion (SE) | 63.0 (1.7)         | 62.0 (1.2)            | 0.674   | 12.0 (0.9)           | 11.0 (0.6)            | 0.707   |
|                              | Low physical activity             | n (%)                    | 506 (65.3)         | 1032 (59.7)           | 0.008   | 875 (71.3)           | 1911 (66.6)           | 0.003   |
|                              |                                   | Adjusted proportion (SE) | 66.0 (1.7)         | 60.0 (1.2)            | 0.004   | 71.0 (1.3)           | 67.0 (0.9)            | 0.002   |
|                              | Small number of meals (< 3 times) | n (%)                    | 70 (9.0)           | 70 (4.0)              | < 0.001 | 69 (5.6)             | 120 (4.2)             | 0.044   |
|                              |                                   | Adjusted proportion (SE) | 7.0 (0.9)          | 3.0 (0.4)             | < 0.001 | 4.0 (0.5)            | 3.0 (0.3)             | 0.113   |

(Continued)

Table 1. (Continued)

| Living condition            | Living conditions      |                          | Males (N = 2,504)  |                       |         | Females (N = 4,097)  |                       |         |
|-----------------------------|------------------------|--------------------------|--------------------|-----------------------|---------|----------------------|-----------------------|---------|
|                             |                        |                          | TH group (N = 775) | NTH group (n = 1,729) | P-value | TH group (N = 1,227) | NTH group (N = 2,870) | P-value |
| Psychosocial factors        | Poor economic status   | n (%)                    | 507 (65.4)         | 802 (46.4)            | < 0.001 | 724 (59.0)           | 1324 (46.1)           | < 0.001 |
|                             |                        | Adjusted proportion (SE) | 65.0 (1.7)         | 47.0 (1.2)            | < 0.001 | 59.0 (1.4)           | 46.0 (0.9)            | < 0.001 |
|                             | Unemployed             | n (%)                    | 167 (21.5)         | 259 (15.0)            | < 0.001 | 338 (27.5)           | 455 (15.9)            | < 0.001 |
|                             |                        | Adjusted proportion (SE) | 21.0 (1.5)         | 15.0 (0.9)            | < 0.001 | 27.0 (1.3)           | 15.0 (0.7)            | < 0.001 |
|                             | Psychological distress | n (%)                    | 305 (39.4)         | 558 (32.3)            | 0.001   | 652 (53.1)           | 1276 (44.5)           | < 0.001 |
|                             |                        | Adjusted proportion (SE) | 39.0 (1.8)         | 32.0 (1.1)            | 0.002   | 53.0 (1.4)           | 44.0 (0.9)            | < 0.001 |
|                             | Insomnia               | n (%)                    | 247 (31.9)         | 373 (21.6)            | < 0.001 | 548 (44.7)           | 994 (34.6)            | < 0.001 |
|                             |                        | Adjusted proportion (SE) | 31.0 (1.7)         | 22.0 (1.0)            | < 0.001 | 45.0 (1.4)           | 35.0 (0.9)            | < 0.001 |
| Cardiovascular risk factors | Overweight             | n (%)                    | 288 (37.2)         | 633 (36.6)            | 0.792   | 361 (29.4)           | 840 (29.3)            | 0.921   |
|                             |                        | Adjusted proportion (SE) | 37.0 (1.7)         | 37.0 (1.2)            | 0.999   | 29.0 (1.3)           | 29.0 (0.9)            | 0.872   |
|                             | Hypertension           | n (%)                    | 392 (50.6)         | 899 (52.0)            | 0.513   | 531 (43.3)           | 1187 (41.4)           | 0.255   |
|                             |                        | Adjusted proportion (SE) | 52.0 (1.9)         | 51.0 (1.3)            | 0.603   | 41.0 (1.6)           | 38.0 (1.0)            | 0.124   |
|                             | Dyslipidemia           | n (%)                    | 278 (35.9)         | 541 (31.3)            | 0.024   | 588 (47.9)           | 1321 (46.0)           | 0.266   |
|                             |                        | Adjusted proportion (SE) | 35.0 (1.7)         | 31.0 (1.1)            | 0.053   | 48.0 (1.4)           | 46.0 (0.9)            | 0.215   |
|                             | Diabetes mellitus      | n (%)                    | 121 (15.6)         | 250 (14.5)            | 0.453   | 90 (7.3)             | 195 (6.8)             | 0.533   |
|                             |                        | Adjusted proportion (SE) | 16.0 (1.3)         | 14.0 (0.8)            | 0.224   | 6.0 (0.7)            | 6.0 (0.5)             | 0.521   |

In the categorical variables, the upper row indicates n (%) and lower row indicates adjusted proportion (standard error).

In the continuous variables, the upper row indicates mean (standard deviation) and lower row indicates adjusted mean (standard error).

Abbreviations: TH group, temporary housing group; NTH group, non-temporary housing group; SBP, systolic blood pressure; DBP, diastolic blood pressure; TC, total cholesterol; HDLC, high-density lipoprotein cholesterol; HbA1c, glycosylated hemoglobin; nonHDLc, non-high-density lipoprotein cholesterol; SD, standard deviation; SE, standard error.

In the crude analysis, P-values were calculated using the chi-square test for categorical values and Student's t-test for continuous values.

In the age-adjusted analysis, P-values were calculated using logistic regression analysis for categorical values and analysis of covariance for continuous values.

doi:10.1371/journal.pone.0166817.t001

older than those in the TH group. In age-adjusted analysis, there was no significant difference in body weight between the TH and NTH groups for either sex. The significant differences in TC levels, nonHDLc levels, and proportion of participants with dyslipidemia in the TH and NTH groups disappeared after age-adjusted analysis. Current smokers, low physical activity, small number of meals (<3 times), poor economic status, unemployed, psychological distress, and insomnia were more prevalent in the TH group than in the NTH group even after age-adjusted analysis. In females, the significant difference between the TH and the NTH groups in the prevalence of small number of meals (<3 times a day) disappeared after age-adjusted analysis. Even after age-adjusted analysis, the NTH group had significantly higher SBP and



**Table 2. Mean changes in body weight in all participants according to age in the TH and NTH groups.**

| Living conditions       |       | Males (N = 2,504)    |                       |         | Females (N = 4,097)  |                       |         |
|-------------------------|-------|----------------------|-----------------------|---------|----------------------|-----------------------|---------|
|                         |       | TH group (N = 775)   | NTH group (n = 1,729) | P-value | TH group (N = 1,227) | NTH group (N = 2,870) | P-value |
|                         |       | Mean change (95% CI) | Mean change (95% CI)  |         | Mean change (95% CI) | Mean change (95% CI)  |         |
| <b>All participants</b> |       | 0.19 (0.00–0.37)     | -0.31 (-0.42 - -0.19) | < 0.001 | 0.59 (0.46–0.71)     | 0.02 (-0.06–0.10)     | < 0.001 |
| <b>Age groups</b>       | 18–44 | 0.43 (-0.24–1.10)    | -0.26 (-0.75–0.23)    | 0.101   | 0.79 (0.68–0.90)     | 0.20 (-0.08–0.47)     | 0.014   |
|                         | 45–54 | 0.23 (-0.29–0.76)    | -0.14 (-0.60–0.33)    | 0.363   | 0.33 (0.28–0.39)     | 0.11 (-0.17–0.38)     | 0.369   |
|                         | 55–64 | 0.20 (-0.25–0.64)    | -0.26 (-0.54–0.02)    | 0.085   | 0.65 (0.58–0.72)     | 0.04 (-0.09–0.17)     | <0.001  |
|                         | 65–74 | 0.19 (-0.09–0.47)    | -0.41 (-0.58 - -0.24) | <0.001  | 0.64 (0.58–0.70)     | -0.05 (-0.17–0.08)    | <0.001  |
|                         | ≥75   | -0.05 (-0.41–0.31)   | -0.25 (-0.45 - -0.06) | 0.335   | 0.35 (0.30–0.40)     | -0.12 (-0.29–0.06)    | 0.003   |

Abbreviations: TH group, temporary housing group; NTH group, non- temporary housing group; BMI, body mass index; CI, confidence interval  
P-values were calculated using Student’s t-test.

doi:10.1371/journal.pone.0166817.t002

HbA1c levels than those in the TH group. However, low physical activity, poor economic status, unemployed, psychological distress, and insomnia were more prevalent in the TH group than in the NTH group.

Table 2 presents the mean changes in body weight for all participants according to age in the TH and NTH groups. Body weights of males in the TH group increased except for those aged ≥75 years, while body weights of males in the NTH group decreased for all age groups. Body weights of females in the TH group decreased for all age group, while body weights in the NTH group were almost constant. In all subjects, there was a significant difference in mean changes in body weight between the TH and NTH groups in both sexes. In addition, body weight significantly increased in the TH group compared to that in the NTH group (mean change in body weight [95% CI] in males: TH group, +0.19 kg [0.00–0.37]; NTH group, -0.30 kg [-0.42 - -0.19]; P-value < 0.001; females: TH group, +0.57 kg [0.46–0.71]; NTH group, +0.02 kg [-0.06–0.10]; P-value < 0.001).

Table 3 reveals the results of multiple linear regression analysis of variables for examining the mean change in body weight from 2011 to 2012. The partial regression coefficient of mean change in body weight [standard error] in males in the TH group (reference: NTH group) was +0.52 kg [0.11] (P-value < 0.001) and that in females in TH group (reference: NTH group) was +0.56 kg [0.08] (P-value < 0.001). In males, there were significant relationships of the mean change in body weight with living condition (P-value < 0.001), age (P-value = 0.021), body weight (P-value = 0.009), HbA1c (P-value = 0.007) and quitting smoking (P-value = 0.010). In females, there were significant relationships of mean change in body weight with living condition (P-value < 0.001), SBP (P-value < 0.001), HDLC (P-value = 0.013) and quitting smoking (P-value = 0.035).

Table 4 summarizes the age-adjusted mean changes in body weight in the TH group and NTH group stratified by life style factors, psychosocial factors, and cardiovascular risk factors. The age-adjusted mean change in body weight increased in the TH group in all subjects except for male subjects who were non-drinkers, male subjects who were overweight and male subjects who had dyslipidemia. The age-adjusted mean change in body weight was significantly greater in the TH group than in the NTH group stratified by all factors in both sexes except for the male who quit smoking.

## Discussion

In this study, while there was no significant difference between body weights in the TH group and NTH group in the 2011 survey (about 7 months after the Great East Japan Earthquake and

Tsunami), there was a significant difference between the mean changes in body weight in the TH group and NTH group from the 2011 survey to the 2012 survey (about 7–18 months after the disaster) for both sexes. Body weight increased in the TH group but decreased in the NTH group for both sexes in all age groups except for male subjects aged  $\geq 75$  years. In the multiple linear regression analysis, change in body weight was significantly greater in the TH group than in the NTH group in both sexes. In the stratified analysis, the age-adjusted mean changes in body weight increased in both sexes in the TH group regardless of life style, psychosocial factors and cardiovascular risk factors. The age-adjusted mean change in body weight was significantly greater in the TH group than in the NTH group in both sexes stratified by all factors except for quitting smoking in males. The findings obtained after adjusting for unfavorable risk factors including life style, psychosocial factors and cardiovascular risk factors identified that both males and females living in temporary housing had a significant increase in body weight. This is the first report revealed that body weights of people living in poor conditions in an area affected by the disaster increased significantly during the medium-term and long-term recovery phases after the disaster.

Previous studies have reported that the body weights of survivors in affected areas changed in the short term after an earthquake or hurricane. Survivors of the Irpinia earthquake (1980, Italy) reported increased body weight (+1.4 kg) 2 months after the disaster [10]. In the Great East Japan Earthquake and Tsunami, evacuees in the Soma area in Fukushima Prefecture reported increased body weight (+0.6 kg) 6 months after the disaster [11]. Based on the results of those studies, the participants in our study had significantly increased body weight about 7 months after the disaster. Furthermore, our results provided that body weights of participants in the NTH group were decreased about 18 months after the disaster indicate that body weights might decrease to weights prior to the disaster. On the other hand, the results revealed

**Table 3. Multiple linear regression analysis of variables for examining mean change in body weight between 2011 and 2012.**

| Variable                                                                                                 | Males (N = 2,504) |      |         | Females (N = 4,097) |      |         |
|----------------------------------------------------------------------------------------------------------|-------------------|------|---------|---------------------|------|---------|
|                                                                                                          | B                 | SE   | P-value | B                   | SE   | P-value |
| <b>TH group vs NTH group (2012)</b>                                                                      | 0.52              | 0.11 | <0.001  | 0.56                | 0.08 | <0.001  |
| <b>Age (2011)</b>                                                                                        | -0.01             | 0.01 | 0.021   | 0.00                | 0.00 | 0.672   |
| <b>Body weight (2011)</b>                                                                                | -0.01             | 0.01 | 0.009   | 0.01                | 0.00 | 0.246   |
| <b>SBP (2011)</b>                                                                                        | 0.00              | 0.00 | 0.253   | -0.01               | 0.00 | <0.001  |
| <b>TC (2011)</b>                                                                                         | 0.00              | 0.00 | 0.453   | 0.00                | 0.00 | 0.791   |
| <b>HDLC (2011)</b>                                                                                       | 0.00              | 0.00 | 0.201   | 0.01                | 0.00 | 0.013   |
| <b>HbA1c (2011)</b>                                                                                      | -0.20             | 0.08 | 0.007   | -0.06               | 0.07 | 0.331   |
| <b>Current smokers vs not current smokers (2011)</b>                                                     | -0.01             | 0.12 | 0.942   | -0.07               | 0.17 | 0.661   |
| <b>Quitting smoking vs not quitting smoking</b>                                                          | 1.00              | 0.39 | 0.01    | 1.02                | 0.48 | 0.035   |
| <b>Drinkers vs non-drinkers (2011)</b>                                                                   | -0.01             | 0.11 | 0.961   | -0.11               | 0.10 | 0.289   |
| <b>Low physical activity vs normal physical activity (2011)</b>                                          | 0.01              | 0.11 | 0.963   | 0.03                | 0.07 | 0.722   |
| <b>Small number of meals (&lt; 3 times) vs normal number of meals (<math>\geq 3</math> times) (2011)</b> | -0.13             | 0.23 | 0.566   | 0.10                | 0.17 | 0.567   |
| <b>Poor economic status vs normal economic status (2011)</b>                                             | -0.10             | 0.11 | 0.343   | -0.04               | 0.07 | 0.591   |
| <b>Unemployed vs employed (2011)</b>                                                                     | -0.21             | 0.14 | 0.130   | -0.17               | 0.09 | 0.062   |
| <b>Psychological distress vs no psychological distress (2011)</b>                                        | 0.04              | 0.12 | 0.712   | 0.05                | 0.07 | 0.487   |
| <b>Insomnia vs no insomnia (2011)</b>                                                                    | 0.07              | 0.13 | 0.608   | 0.06                | 0.08 | 0.416   |

B: partial regression coefficients.

Abbreviations: TH group, temporary housing group; NTH group, non- temporary housing group; SBP, systolic blood pressure; TC, total cholesterol; HDLC, high-density lipoprotein cholesterol; HbA1c, glycosylated hemoglobin; SE, standard error.

P-values were calculated by multiple linear regression analysis.

doi:10.1371/journal.pone.0166817.t003

**Table 4. Age-adjusted mean change in body weight between the TH group and NTH group stratified by lifestyle factors, psychosocial factors, and cardiovascular risk factors.**

|                             |                        |                           | Males (N = 2,504)  |       |      |                       |       |       |         | Females (N = 4,097)  |      |      |                       |       |         |         |
|-----------------------------|------------------------|---------------------------|--------------------|-------|------|-----------------------|-------|-------|---------|----------------------|------|------|-----------------------|-------|---------|---------|
|                             |                        |                           | TH group (N = 775) |       |      | NTH group (n = 1,729) |       |       |         | TH group (N = 1,227) |      |      | NTH group (n = 2,870) |       |         |         |
|                             |                        |                           | n                  | Mean  | SD   | n                     | Mean  | SD    | P-value | n                    | Mean | SD   | n                     | Mean  | SD      | P-value |
| Life style factors          | Smoking                | Current smokers           | 250                | 0.22  | 0.17 | 444                   | -0.19 | 0.13  | 0.053   | 75                   | 0.35 | 0.28 | 146                   | 0.32  | 0.20    | 0.921   |
|                             |                        | Not current smokers       | 525                | 0.16  | 0.11 | 1285                  | -0.34 | 0.07  | < 0.001 | 1152                 | 0.60 | 0.06 | 2724                  | 0.00  | 0.04    | < 0.001 |
|                             | Quitting smoking       | Quitting smoking          | 16                 | 0.83  | 0.92 | 30                    | 0.92  | 0.67  | 0.938   | 7                    | 1.25 | 1.10 | 15                    | 1.21  | 0.73    | 0.978   |
|                             |                        | Not quitting smoking      | 759                | 0.16  | 0.09 | 1699                  | -0.32 | 0.06  | < 0.001 | 1220                 | 0.58 | 0.06 | 2855                  | 0.01  | 0.04    | < 0.001 |
|                             | Drinkers               | Drinkers                  | 490                | 0.30  | 0.11 | 1073                  | -0.34 | 0.07  | < 0.001 | 168                  | 0.64 | 0.17 | 368                   | -0.01 | 0.11    | 0.001   |
|                             |                        | Non-drinkers              | 285                | -0.03 | 0.17 | 656                   | -0.24 | 0.11  | 0.286   | 1059                 | 0.58 | 0.07 | 2502                  | 0.02  | 0.04    | < 0.001 |
|                             | Physical activity      | Low physical activity     | 506                | 0.19  | 0.11 | 1032                  | -0.32 | 0.08  | < 0.001 | 875                  | 0.55 | 0.07 | 1911                  | 0.04  | 0.05    | < 0.001 |
|                             |                        | Normal physical activity  | 269                | 0.15  | 0.16 | 697                   | -0.28 | 0.10  | 0.022   | 352                  | 0.67 | 0.11 | 959                   | -0.03 | 0.07    | < 0.001 |
|                             | Diet                   | A small number of meals   | 70                 | 0.08  | 0.37 | 70                    | -0.37 | 0.37  | 0.393   | 69                   | 0.42 | 0.30 | 120                   | 0.40  | 0.23    | 0.950   |
|                             |                        | Normal number of meals    | 705                | 0.19  | 0.09 | 1659                  | -0.30 | 0.06  | < 0.001 | 1158                 | 0.60 | 0.06 | 2750                  | 0.00  | 0.04    | < 0.001 |
| Psychosocial factors        | Economic status        | Poor economic status      | 507                | 0.17  | 0.12 | 802                   | -0.35 | 0.09  | 0.001   | 724                  | 0.59 | 0.09 | 1324                  | 0.01  | 0.06    | < 0.001 |
|                             |                        | Normal                    | 268                | 0.20  | 0.15 | 927                   | -0.26 | 0.08  | 0.006   | 503                  | 0.58 | 0.09 | 1546                  | 0.03  | 0.05    | < 0.001 |
|                             | Occupational status    | Unemployed                | 167                | 0.01  | 0.23 | 259                   | -0.46 | 0.18  | 0.111   | 338                  | 0.52 | 0.13 | 455                   | -0.13 | 0.11    | < 0.001 |
|                             |                        | Employed                  | 608                | 0.22  | 0.10 | 1470                  | -0.27 | 0.06  | < 0.001 | 889                  | 0.61 | 0.07 | 2415                  | 0.05  | 0.04    | < 0.001 |
|                             | Psychological distress | Psychological distress    | 305                | 0.24  | 0.15 | 558                   | -0.27 | 0.11  | 0.008   | 652                  | 0.64 | 0.09 | 1276                  | 0.04  | 0.07    | < 0.001 |
|                             |                        | No psychological distress | 470                | 0.14  | 0.11 | 1171                  | -0.32 | 0.07  | 0.001   | 575                  | 0.52 | 0.08 | 1594                  | 0.00  | 0.05    | < 0.001 |
| Insomnia                    | Insomnia               | 247                       | 0.30               | 0.18  | 373  | -0.31                 | 0.15  | 0.011 | 548     | 0.65                 | 0.10 | 994  | 0.05                  | 0.07  | < 0.001 |         |
|                             | No insomnia            | 528                       | 0.12               | 0.11  | 1356 | -0.30                 | 0.07  | 0.001 | 679     | 0.53                 | 0.08 | 1876 | 0.00                  | 0.05  | < 0.001 |         |
| Cardiovascular risk factors | Overweight             | Overweight                | 288                | -0.02 | 0.17 | 633                   | -0.51 | 0.12  | 0.018   | 361                  | 0.62 | 0.13 | 840                   | -0.07 | 0.09    | < 0.001 |
|                             |                        | Non overweight            | 487                | 0.29  | 0.10 | 1096                  | -0.18 | 0.07  | < 0.001 | 866                  | 0.57 | 0.07 | 2030                  | 0.06  | 0.05    | < 0.001 |
|                             | Hypertension           | Hypertension              | 392                | 0.12  | 0.13 | 899                   | -0.36 | 0.09  | 0.002   | 531                  | 0.56 | 0.09 | 1187                  | -0.10 | 0.06    | < 0.001 |
|                             |                        | Non hypertension          | 383                | 0.25  | 0.13 | 830                   | -0.24 | 0.09  | 0.002   | 696                  | 0.60 | 0.08 | 1683                  | 0.10  | 0.05    | < 0.001 |
|                             | Dyslipidemia           | Dyslipidemia              | 278                | -0.03 | 0.16 | 541                   | -0.30 | 0.11  | 0.163   | 588                  | 0.66 | 0.09 | 1321                  | -0.04 | 0.06    | < 0.001 |

(Continued)

Table 4. (Continued)

|                          |                              | Males (N = 2,504)  |      |      |                       |       |      |         | Females (N = 4,097)  |      |      |                       |       |      |         |
|--------------------------|------------------------------|--------------------|------|------|-----------------------|-------|------|---------|----------------------|------|------|-----------------------|-------|------|---------|
|                          |                              | TH group (N = 775) |      |      | NTH group (n = 1,729) |       |      |         | TH group (N = 1,227) |      |      | NTH group (n = 2,870) |       |      |         |
|                          |                              | n                  | Mean | SD   | n                     | Mean  | SD   | P-value | n                    | Mean | SD   | n                     | Mean  | SD   | P-value |
|                          | <b>Non Dyslipidemia</b>      | 497                | 0.29 | 0.11 | 1188                  | -0.30 | 0.07 | < 0.001 | 639                  | 0.51 | 0.09 | 1549                  | 0.07  | 0.06 | < 0.001 |
| <b>Diabetes mellitus</b> | <b>Diabetes mellitus</b>     | 121                | 0.10 | 0.27 | 250                   | -0.56 | 0.19 | 0.043   | 90                   | 0.27 | 0.25 | 195                   | -0.51 | 0.17 | 0.011   |
|                          | <b>Non diabetes mellitus</b> | 654                | 0.19 | 0.10 | 1479                  | -0.26 | 0.06 | < 0.001 | 1137                 | 0.61 | 0.06 | 2675                  | 0.06  | 0.04 | < 0.001 |

Abbreviations: TH group, temporary housing group; NTH group, non- temporary housing group. P-values were calculated using analysis of covariance.

doi:10.1371/journal.pone.0166817.t004

that body weights in the TH group were increased about 18 months after the disaster indicate that subjects in the TH group might have had increase in body weight at about 7 months, which further increased at about 18 months after the disaster (males, 0.52 kg; females, 0.56 kg). The difference in changes in body weight was related to the difference in living conditions. Arcaya et al. reported that survivors of Hurricane Katrina revealed an increase in BMI from 7 to 19 months after the disaster [12]. The results of our study were compatible with regard to increased body weight in the TH group but were not compatible regarding other points, the fact that the NTH group identified decreased body weight during the medium-term and long-term recovery phases (about 18 months after the disaster). The subjects of our study were people who had lost their homes in the tsunami and had lived in shelters for several months after the disaster. Furthermore, most of the subjects continued to live in temporary housing (container houses) made from tinplate in tsunami-stricken areas for more than 1 year after the disaster. Thus, body weight in the TH group increased from several months after the disaster due to transfer from shelters to container-type temporary housing. Prolonged stay in temporary housing might therefore be related to body weight gain. Since an increase in body weight of 1 kg increases the risk of cardiovascular disease mortality, the continuous increase in body weight every year after the disaster would cause future cardiovascular disease subjects in the TH group [30–32]. Thus, appropriate care is needed for subjects in the TH group.

In our study, we found that there was a significant difference between changes in body weight in the TH group and NTH group in both sexes. In males, body weight tended to increase or remain constant in the TH group but decreased in the NTH group. On the other hand, in females, body weight increased in the TH group but decreased or remained constant body weight in the NTH group. Some studies have shown that there are differences between body weights of males and females depending on life style and psychosocial factors [33, 34]. It has also been characterized that the association between higher level of stress and greater body weight was more pronounced in females than in males [35]. In our study, a comparison of life style and psychosocial factors between males and females revealed that most of the factors of baseline were worse in females than in males (data not shown). The female subjects in our study might have had changes in hormone levels caused by menopause because about 50% of the participants were older than > 65 years of age. Therefore, the differences in hormonal effects and life style and psychosocial factors in females might have caused more body weight gain than in males.

In addition to the relationship between living conditions and change in body weight, our study revealed several factors that are related to change in body weight. In males, body weight was positively associated with quitting smoking and was negatively associated with older age, greater body weight in 2011 and higher HbA1c. In females, body weight was positively associated with higher HDLC and quitting smoking and was negatively associated with higher SBP. Past studies reported that quitting smoking was associated with body weight gain and that older age was associated with body weight loss [36, 37]. On the other hand, our results identified there were negative associations of body weight with other factors including greater body weight in 2011 and higher HbA1c in males and lower HDLC and higher SBP in females who were in an unfavorable health condition in 2011. One possible explanation for the loss in body weight is that they might have changed their behavior due to awareness of unhealthy conditions in 2011 or they might have received medical intervention. Secondly, it is possible that there might be reverse causation between those factors and change in body weight.

A major factor causing body weight gain is energy imbalance, which is linked to a sedentary lifestyle and irregular dietary patterns [7, 38, 39]. Previous studies showed that survivors living in shelters and temporary housing tended to be immobile [14, 40] and tended to change their dietary pattern [41, 42]. We showed that the subjects in the TH group tended to have a lower level of physical activity and eat a smaller number of meals per day than subjects in the NTH group. However, we did not ask the subjects about changes in access to certain kinds of food, changes in the ability to prepare foods, and changes in the type and amount of food. Nishi et al. reported that people who were in difficult living conditions after Great East Japan Earthquake were likely to have a lower prudent dietary pattern (high intake of vegetables, fruits, seafood, and soy foods) [43]. Dietary patterns including prudent dietary pattern are associated with body weight changes [44–46]. Body weight gain in the TH group might be related to dietary pattern.

Although psychosocial factors were not related to changes in body weight in the TH group and the NTH group in multivariate analysis, living in temporary housing had an influence on body weight changes. It was previously reported that possible reasons for changes in body weight are environmental and psychosocial factors. Community environment factors, such as the home, health care and workplace, and social factors, such as marital status and educational level, all influence daily behavior [38, 47–52]. Daily behavior, which plays an important role in increasing energy consumption and decreasing energy expenditure, influences body weight [50]. However, there have been no reports the relationships of change in body weight with environmental and psychosocial factors after the disaster. Living in a small and inconvenient home might have an influence the behavior of survivors. Another possible explanation in the Great East Japan Earthquake was the difference in ease of access to medical services after the disaster. People living in temporary housing, for whom access to medical/health services might be difficult, could not receive appropriate medical guidance. Those factors might have affected body weight in the TH group during the medium-term and long-term recovery phases after the disaster. In this study, we could not investigate these possibilities. Further study is therefore needed.

The government has not been able to meet all of the demands of the survivors because the Great East Japan Earthquake and Tsunami destroyed a large area, which was already economically and socially weak owing to the aging society in the area. Owing to the limitations of the government, recovery will take a long time and survivors will have to continue to live in temporary housing for a long time. After the Great Hanshin Awaji Earthquake in 1995 in Japan, it took 5 years for all of the residents to move out of temporary housing. Considering the association between body weight gain and living in difficult conditions and the probability that

survivors will continue to live in temporary housing for a long time, we must continue to monitor the body weights of people living in temporary housing.

## Limitations

The present study had several limitations. First, generalizability of the results is limited because the percentage of subjects aged 65 years or older in this study was larger than the total population in the affected area in October 2011 (49.9% versus 42%). Our sample may not be representative of the general population. We conducted additional analysis stratified by age of 65 years (S1 Table). There were significant relationships between mean change in body weight and living conditions in both sexes and in all age groups. The results suggested that the large percentage of elderly in our study did not affect the generality of the main conclusion. Another limitation is that we selected only people who took part in our surveys in 2011 and 2012. Unfortunately, we did not have information regarding for non-participants such as occupational status and body weight change. There was a possibility that our participants were likely to gain body weight because non-participants who were more prevalent in young male who were busy with jobs. We provided a comparison of baseline characteristics of the non-participants and participants (S2 Table). The percentage of elderly females in participants was large, than that in non-participants. Our results might not be valid for young males. However, considering life style factors, participants tended to be healthier than non-participants. Since non-participants had a more unfavorable lifestyle, large proportions of them being smokers and eating a small number of meals, their body weight may have increased more than that of the participants. We do not know whether the results of our study were overestimations or underestimations. Third, although we assessed psychological distress by the K6 scale, which has been validated as having high screening performance for measurement of mood disorders including depression, we did not assess PTSD. Because the Great East Japan Earthquake was of an unprecedented great scale, we made ethical decisions regarding the exclusion of an enormous questionnaire to vulnerable participants after the disaster. It has been reported that people with higher psychological stress are more likely to exhibit less healthy dietary behaviors with higher body weight [53]. Changes in the frequency of meals and types of foods consumed as a result of psychological trauma might have caused body weight gain in the TH group. Finally, we could not investigate details of food consumption and physical activity because we did not ask about details of these factors. Notably, we could not verify whether the calorie intake in the TH group was higher. Moreover, we did not ask about environmental and socioeconomic factors, including income, type of employment, educational level, relevant medications and disaster-related physical disabilities in our questionnaires. Since we started our study soon after the disaster, we had to reduce items of the questionnaire due to consideration of ethical aspects. If we had asked about these items, we may explain the relationship temporary housing and body weight gain more strongly.

## Conclusion

Analysis after adjusting for possible confounding factors showed that body weights significantly increased by +0.52 kg in males and by +0.56 kg in females (reference; NTH group) living in temporary housing in tsunami-stricken areas from 7 months to 18 months after the disaster. The results suggest that living in temporary housing after a catastrophic disaster is an important risk factor of body weight gain. Survivors have now been living in poor conditions such as temporary housing for more than 4 years. Therefore, we should plan to control body weights of disaster survivors living in temporary housing during the medium-term and long-term recovery phases after the disaster.



## Supporting Information

**S1 Fig. Photograph of temporary housing.** (A) Total image. (B) Extended image.  
(TIF)

**S1 Table. Multiple linear regression analysis of variables for examining mean change in body weight stratified by age of 65 years from 2011 to 2012.**  
(PDF)

**S2 Table. Comparison of baseline characteristics of the non-participants and participants.**  
(PDF)

**S3 Table. The data in the present study.**  
(PDF)

## Acknowledgments

The authors would like to thank the participants of this study as well as the many health care workers. We thank Dr. Masaki Ohsawa, Dr. Toru Kuribayashi, and Dr. Kazuyoshi Itai for useful advice.

## Author Contributions

**Conceptualization:** ST.

**Data curation:** Y. Yokoyama Y. Yonekura.

**Formal analysis:** ST Y. Yonekura.

**Funding acquisition:** KS TY.

**Investigation:** ST Y. Yokoyama Y. Yonekura RS KT KS TY.

**Methodology:** ST Y. Yonekura.

**Project administration:** KS.

**Resources:** RS SK KS AO.

**Software:** Y. Yonekura Y.Y okoyama.

**Supervision:** TY.

**Validation:** Y. Yokoyama KS.

**Visualization:** ST.

**Writing – original draft:** ST.

**Writing – review & editing:** SK KT Y. Yonekura TY.

## References

1. Cabinet Office, Government of Japan. The number of victims in evacuation shelters by the Great East Japan earthquake [Internet]. Tokyo: Cabinet Office, Government of Japan; 2011 [updated 2011 Sep 22; cited 2014 Oct 1]. Available from: [www.cao.go.jp/shien/1-hisaisha/pdf/5-hikaku.pdf](http://www.cao.go.jp/shien/1-hisaisha/pdf/5-hikaku.pdf).
2. Geospatial Information Authority of Japan. The area of the inundation range caused by the tsunami (approximate value) [Internet]. Ibaraki: Geospatial Information Authority of Japan, Ministry of Land, Infrastructure, Transport and Tourism; 2011 [updated 2011 Apr 18; cited 2014 Oct 14]. Available from: [www.gsi.go.jp/common/000059939.pdf](http://www.gsi.go.jp/common/000059939.pdf).

3. The National Police Agency. Damage situation and police measures of the 2011 off the Pacific coast of Tohoku Earthquake [Internet]. Tokyo: The national police agency, Japan; 2014 [updated 2014 Feb 10; cited 2014 Feb 12]. Available from: <http://www.npa.go.jp/archive/keibi/biki/higaijokyo.pdf>.
4. Japan Science and Technology Agency. The Great East Japan Earthquake Information from Official Websites 2011 Oct 12 2014. Available from: <http://www.jst.go.jp/saigai.html>.
5. Economic Research Bureau, The Cabinet Office, Government of Japan. The amount of capital stock of the damage estimate [Internet]. Tokyo: Economic Research Bureau, The Cabinet Office, Government of Japan; 2011 [updated 2011 Nov; cited 2015 Apr 15]. Available from: [www.cao.go.jp/j-jr/cr11/pdf/chr11\\_zu2-2.pdf](http://www.cao.go.jp/j-jr/cr11/pdf/chr11_zu2-2.pdf).
6. Division of Consumer and Environmental Protection, Reconstruction bureau, Iwate prefecture. The situation of the victim in emergency temporary housing and -turned-temporary housing units [Internet]. Iwate: Division of Consumer and Environmental Protection Reconstruction bureau, Iwate prefecture; 2015 [updated 2015 Jul 31; cited 2015 August 22]. Available from: [http://www.pref.iwate.jp/dbps\\_data/material/\\_files/000/000/023/870/minashi2707.pdf](http://www.pref.iwate.jp/dbps_data/material/_files/000/000/023/870/minashi2707.pdf).
7. School of public health, Harvard T.H.CHAN. Health Risk Boston: School of public health, Harvard T.H. CHAN; 2015 [cited 2015 Jul 1]. Available from: <http://www.hsph.harvard.edu/obesity-prevention-source/obesity-consequences/health-effects/>.
8. Goff DC Jr., Lloyd-Jones DM, Bennett G, Coady S, D'Agostino RB, Gibbons R, et al. 2013 ACC/AHA guideline on the assessment of cardiovascular risk: a report of the American College of Cardiology/American Heart Association Task Force on Practice Guidelines. *Circulation*. 2014; 129(25 Suppl 2): S49–73. Epub 2013/11/14.
9. Shimamoto K. Guidelines for the primary prevention of ischemic heart disease revised version (JCS 2012). Tokyo: The Japan circulation society, 2012.
10. Trevisan M, Celentano E, Meucci C, Farinaro E, Jossa F, Krogh V, et al. Short-term effect of natural disasters on coronary heart disease risk factors. *Arteriosclerosis*. 1986; 6(5):491–4. Epub 1986/09/01. PMID: [3767693](#)
11. Tsubokura M, Takita M, Matsumura T, Hara K, Tanimoto T, Kobayashi K, et al. Changes in metabolic profiles after the Great East Japan Earthquake: a retrospective observational study. *BMC Public Health*. 2013; 13:267. doi: [10.1186/1471-2458-13-267](https://doi.org/10.1186/1471-2458-13-267) PMID: [23521922](#)
12. Arcaya M, James P, Rhodes JE, Waters MC, Subramanian SV. Urban sprawl and body mass index among displaced Hurricane Katrina survivors. *Prev Med*. 2014; 65:40–6. Epub 2014/04/16. doi: [10.1016/j.ypmed.2014.04.006](https://doi.org/10.1016/j.ypmed.2014.04.006) PMID: [24732717](#)
13. Ishiki A, Okinaga S, Tomita N, Kawahara R, Tsuji I, Nagatomi R, et al. Changes in Cognitive Functions in the Elderly Living in Temporary Housing after the Great East Japan Earthquake. *PloS one*. 2016; 11(1):e0147025. Epub 2016/01/14. doi: [10.1371/journal.pone.0147025](https://doi.org/10.1371/journal.pone.0147025) PMID: [26760971](#)
14. Takahashi S, Ishiki M, Kondo N, Ishiki A, Toriyama T, Takahashi S, et al. Health effects of a farming program to foster community social capital of a temporary housing complex of the 2011 great East Japan earthquake. *Disaster medicine and public health preparedness*. 2015; 9(2):103–10. Epub 2015/02/17. doi: [10.1017/dmp.2015.6](https://doi.org/10.1017/dmp.2015.6) PMID: [25682770](#)
15. Ishii T, Ochi S, Tsubokura M, Kato S, Tetsuda T, Kato J, et al. Physical performance deterioration of temporary housing residents after the Great East Japan Earthquake. *Preventive medicine reports*. 2015; 2:916–9. Epub 2016/02/05. doi: [10.1016/j.pmedr.2015.10.009](https://doi.org/10.1016/j.pmedr.2015.10.009) PMID: [26844168](#)
16. Sone T, Nakaya N, Sugawara Y, Tomata Y, Watanabe T, Tsuji I. Longitudinal association between time-varying social isolation and psychological distress after the Great East Japan Earthquake. *Soc Sci Med*. 2016; 152:96–101. Epub 2016/02/07. doi: [10.1016/j.socscimed.2016.01.037](https://doi.org/10.1016/j.socscimed.2016.01.037) PMID: [26851408](#)
17. Koyama S, Aida J, Kawachi I, Kondo N, Subramanian SV, Ito K, et al. Social support improves mental health among the victims relocated to temporary housing following the Great East Japan Earthquake and Tsunami. *The Tohoku journal of experimental medicine*. 2014; 234(3):241–7. Epub 2014/11/11. PMID: [25382281](#)
18. Yokoyama Y, Otsuka K, Kawakami N, Kobayashi S, Ogawa A, Tanno K, et al. Mental health and related factors after the Great East Japan earthquake and tsunami. *PloS one*. 2014; 9(7):e102497. Epub 2014/07/25. doi: [10.1371/journal.pone.0102497](https://doi.org/10.1371/journal.pone.0102497) PMID: [25057824](#)
19. Ministry of Internal Affairs and Communications. The 2011 off the Pacific coast of Tohoku Earthquake (the Great East Japan Earthquake) data and damage report [Internet]. Tokyo: Ministry of Internal Affairs and Communications; 2015 [updated 2015 May 9; cited 2015 May 21]. 2015 May 9:[Available from: [http://www.fdma.go.jp/bn/higaihou\\_new.html](http://www.fdma.go.jp/bn/higaihou_new.html).
20. Research and Survey Division, Department of Policy and Regional Affairs, Iwate Prefectural Government. Monthly estimate of Iwate prefecture population [Internet]. Iwate: Research and Survey Division, Department of Policy and Regional Affairs, Iwate Prefectural Government; 2011 [updated 2012

November 1; cited 2014 Oct 13]. Available from: <http://www3.pref.iwate.jp/webdb/view/outside/s14Tokei/bnyaBtKekka.html?C=B0203&R=I002>.

21. Ministry of health, labor and welfare, Japan. Exercise guidelines for good health 20062006 3 Aug 2015. Available from: [www.mhlw.go.jp/bunya/kenkou/undou02/pdf/data.pdf](http://www.mhlw.go.jp/bunya/kenkou/undou02/pdf/data.pdf).
22. Murakami H, Yoshimura E, Ishikawa-Takata K, Hasegawa Y, Kubota T, Tsuboyama-Kasaoka N, et al. Validity and reproducibility of a physical activity questionnaire used for health surveying among victims of the Great East Japan Earthquake. *Nihon Koshu Eisei Zasshi*. 2013; 60(4):222–30. PMID: [23909189](#)
23. Sakurai K, Nishi A, Kondo K, Yanagida K, Kawakami N. Screening performance of K6/K10 and other screening instruments for mood and anxiety disorders in Japan. *Psychiatry and clinical neurosciences*. 2011; 65(5):434–41. Epub 2011/08/20. doi: [10.1111/j.1440-1819.2011.02236.x](#) PMID: [21851452](#)
24. Kessler RC, Barker PR, Colpe LJ, Epstein JF, Gfroerer JC, Hiripi E, et al. Screening for serious mental illness in the general population. *Arch Gen Psychiatry*. 2003; 60(2):184–9. Epub 2003/02/13. PMID: [12578436](#)
25. Soldatos CR, Dikeos DG, Paparrigopoulos TJ. Athens Insomnia Scale: Validation of an instrument based on ICD-10 criteria. *J Psychosom Res*. 2000; 48(6):555–60. Epub 2000/10/18. PMID: [11033374](#)
26. Soldatos CR, Dikeos DG, Paparrigopoulos TJ. The diagnostic validity of the Athens Insomnia Scale. *J Psychosom Res*. 2003; 55(3):263–7. Epub 2003/08/23. PMID: [12932801](#)
27. Soldatos CR, Allaert FA, Ohta T, Dikeos DG. How do individuals sleep around the world? Results from a single-day survey in ten countries. *Sleep Med*. 2005; 6(1):5–13. Epub 2005/02/01. doi: [10.1016/j.sleep.2004.10.006](#) PMID: [15680289](#)
28. Okajima I, Nakajima S, Kobayashi M, Inoue Y. Development and validation of the Japanese version of the Athens Insomnia Scale. *Psychiatry and clinical neurosciences*. 2013; 67(6):420–5. Epub 2013/08/06. doi: [10.1111/pcn.12073](#) PMID: [23910517](#)
29. Seino Y, Nanjo K, Tajima N, Kadowaki T, Kashiwagi A, Araki E, et al. Report of the committee on the classification and diagnostic criteria of diabetes mellitus. *J Diabetes Investig*. 2010; 1(5):212–28. Epub 2010/10/19. doi: [10.1111/j.2040-1124.2010.00074.x](#) PMID: [24843435](#)
30. Jousilahti P, Tuomilehto J, Vartiainen E, Pekkanen J, Puska P. Body weight, cardiovascular risk factors, and coronary mortality. 15-year follow-up of middle-aged men and women in eastern Finland. *Circulation*. 1996; 93(7):1372–9. Epub 1996/04/01. PMID: [8641026](#)
31. Arbeeny CM. Addressing the Unmet Medical Need for Safe and Effective Weight Loss Therapies. *Obesity Research*. 2004; 12(8):1191–6. doi: [10.1038/oby.2004.150](#) PMID: [15340099](#)
32. Harsha DW, Bray GA. Weight loss and blood pressure control (Pro). *Hypertension*. 2008; 51(6):1420–5; discussion 5. Epub 2008/05/14. doi: [10.1161/HYPERTENSIONAHA.107.094011](#) PMID: [18474829](#)
33. Chiriboga DE, Ma Y, Li W, Olendzki BC, Pagoto SL, Merriam PA, et al. Gender differences in predictors of body weight and body weight change in healthy adults. *Obesity (Silver Spring, Md)*. 2008; 16(1):137–45. Epub 2008/01/29.
34. Panagiotakos DB, Pitsavos C, Chrysohoou C, Rivas G, Kontogianni MD, Zampelas A, et al. Epidemiology of overweight and obesity in a Greek adult population: the ATTICA Study. *Obes Res*. 2004; 12(12):1914–20. Epub 2005/02/03. doi: [10.1038/oby.2004.239](#) PMID: [15687390](#)
35. Moore CJ, Cunningham SA. Social position, psychological stress, and obesity: a systematic review. *Journal of the Academy of Nutrition and Dietetics*. 2012; 112(4):518–26. Epub 2012/06/20. doi: [10.1016/j.jand.2011.12.001](#) PMID: [22709702](#)
36. Klesges RC, Meyers AW, Klesges LM, La Vasque ME. Smoking, body weight, and their effects on smoking behavior: a comprehensive review of the literature. *Psychological bulletin*. 1989; 106(2):204–30. Epub 1989/09/01. PMID: [2678202](#)
37. Chapman IM. Weight loss in older persons. *The Medical clinics of North America*. 2011; 95(3):579–93, xi. Epub 2011/05/10. doi: [10.1016/j.mcna.2011.02.004](#) PMID: [21549879](#)
38. Aranceta J, Perez-Rodrigo C, Serra-Majem L, Bellido D, de la Torre ML, Formiguera X, et al. Prevention of overweight and obesity: a Spanish approach. *Public health nutrition*. 2007; 10(10A):1187–93. Epub 2007/11/21. doi: [10.1017/S1368980007000699](#) PMID: [17903329](#)
39. Centers for Disease Control and Prevention. Other Factors in Weight Gain [Internet]. Atlanta: Centers for Disease Control and Prevention; 2015 [updated 2011 Sep 13; cited 2015 Jun 17]. Available from: [http://www.cdc.gov/healthyweight/calories/other\\_factors.html?mobile=false](http://www.cdc.gov/healthyweight/calories/other_factors.html?mobile=false).
40. Ueda S, Hanzawa K, Shibata M, Suzuki S. High prevalence of deep vein thrombosis in tsunami-flooded shelters established after the great East-Japan earthquake. *The Tohoku journal of experimental medicine*. 2012; 227(3):199–202. Epub 2012/06/26. PMID: [22728376](#)
41. Tsuboyama-Kasaoka N, Hoshi Y, Onodera K, Mizuno S, Sako K. What factors were important for dietary improvement in emergency shelters after the Great East Japan Earthquake? *Asia Pac J Clin Nutr*. 2014; 23(1):159–66. Epub 2014/02/25. doi: [10.6133/apjcn.2014.23.1.17](#) PMID: [24561984](#)

42. Yoshimura E, Takata K, Hasegawa Y, Murakami H, Nozue M, Sarukura K, et al. Assessment food intake of survivors living in temporary housing in Kamaishi City after Great East Japan Earthquake. (in Japanese). *Iwate Koshueiseigaku Zasshi*. 2014; 25(2):7–14.
43. Nishi N, Yoshimura E, Ishikawa-Takata K, Tsuboyama-Kasaoka N, Kubota T, Miyachi M, et al. Relationship of living conditions with dietary patterns among survivors of the great East Japan earthquake. *Journal of epidemiology / Japan Epidemiological Association*. 2013; 23(5):376–81. Epub 2013/08/13. doi: [10.2188/jea.JE20130025](https://doi.org/10.2188/jea.JE20130025) PMID: [23933622](https://pubmed.ncbi.nlm.nih.gov/23933622/)
44. Office of Disease Prevention and Health Promotion. Dietary Patterns and Body Weight USA: Office of Disease Prevention and Health Promotion; 2016 [updated 2016 Mar 21; cited 2016 Mar 21]. Available from: <http://health.gov/dietaryguidelines/2015-scientific-report/07-chapter-2/d2-3.asp>.
45. Newby PK, Weismayer C, Akesson A, Tucker KL, Wolk A. Longitudinal changes in food patterns predict changes in weight and body mass index and the effects are greatest in obese women. *The Journal of nutrition*. 2006; 136(10):2580–7. Epub 2006/09/22. PMID: [16988130](https://pubmed.ncbi.nlm.nih.gov/16988130/)
46. Newby PK, Muller D, Hallfrisch J, Qiao N, Andres R, Tucker KL. Dietary patterns and changes in body mass index and waist circumference in adults. *Am J Clin Nutr*. 2003; 77(6):1417–25. Epub 2003/06/07. PMID: [12791618](https://pubmed.ncbi.nlm.nih.gov/12791618/)
47. Drewnowski A, Moudon AV, Jiao J, Aggarwal A, Charreire H, Chaix B. Food environment and socioeconomic status influence obesity rates in Seattle and in Paris. *International journal of obesity (2005)*. 2014; 38(2):306–14. Epub 2013/06/06.
48. Kivimaki M, Head J, Ferrie JE, Shipley MJ, Brunner E, Vahtera J, et al. Work stress, weight gain and weight loss: evidence for bidirectional effects of job strain on body mass index in the Whitehall II study. *International journal of obesity (2005)*. 2006; 30(6):982–7. Epub 2006/01/19.
49. Martikainen PT, Marmot MG. Socioeconomic differences in weight gain and determinants and consequences of coronary risk factors. *Am J Clin Nutr*. 1999; 69(4):719–26. Epub 1999/04/10. PMID: [10197574](https://pubmed.ncbi.nlm.nih.gov/10197574/)
50. Papas MA, Alberg AJ, Ewing R, Helzlsouer KJ, Gary TL, Klassen AC. The built environment and obesity. *Epidemiol Rev*. 2007; 29:129–43. Epub 2007/05/30. doi: [10.1093/epirev/mxm009](https://doi.org/10.1093/epirev/mxm009) PMID: [17533172](https://pubmed.ncbi.nlm.nih.gov/17533172/)
51. Aranceta J, Perez-Rodrigo C, Serra-Majem L, Ribas L, Quiles-Izquierdo J, Vioque J, et al. Influence of sociodemographic factors in the prevalence of obesity in Spain. The SEEDO'97 Study. *Eur J Clin Nutr*. 2001; 55(6):430–5. Epub 2001/06/26. doi: [10.1038/sj.ejcn.1601189](https://doi.org/10.1038/sj.ejcn.1601189) PMID: [11423919](https://pubmed.ncbi.nlm.nih.gov/11423919/)
52. Centers for Disease Control and Prevention. Adult Obesity Causes & Consequences [Internet]. Atlanta: Centers for Disease Control and Prevention; 2015 [updated 2015 Jun 16; cited 2015 July 21]. Available from: <http://www.cdc.gov/obesity/adult/causes.html>.
53. Harding JL, Backholer K, Williams ED, Peeters A, Cameron AJ, Hare MJ, et al. Psychosocial stress is positively associated with body mass index gain over 5 years: evidence from the longitudinal AusDiab study. *Obesity*. 2014; 22(1):277–86. Epub 2013/03/21. doi: [10.1002/oby.20423](https://doi.org/10.1002/oby.20423) PMID: [23512679](https://pubmed.ncbi.nlm.nih.gov/23512679/)
